# Supplementary material for: The Crosstalk between Cardiac Lipotoxicity and Mitochondrial Oxidative Stress in the Cardiac Alterations in Diet-Induced Obesity in Rats
Source: PubMed Central journal article supplement (PMC7072852; doi:10.3390/cells9020451), 2020-02-17
Supplement: cells-09-00451-s001.pdf [file cells-09-00451-s001.pdf]

# Supplemental figure legends

Figure S1

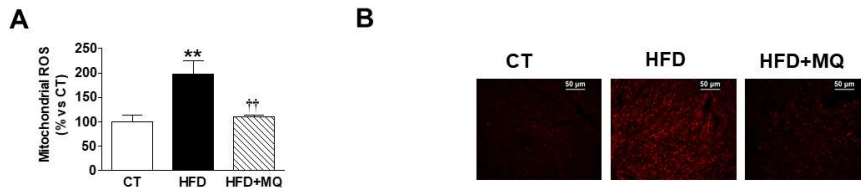

**Figure 1. Effects of the mitochondrial antioxidant MitoQ (MQ) on mitochondrial superoxide anion levels.** Hearts from rats fed a standard diet (CT) or a high fat diet (HFD) treated with vehicle or with MQ, the mitochondrial antioxidant (200  $\mu$ M), were analyzed. (A) Quantification of mitochondrial cardiac levels of superoxide anion and (B) Representative microphotographs of cardiac sections labeled with MitoSox are presented. Magnification ( $\times 40$ ). Bar graphs represent the mean  $\pm$  SEM of 5 animals. \*\* $p < 0.01$  vs. control group. †† $p < 0.01$  vs HFD group.

Figure S2

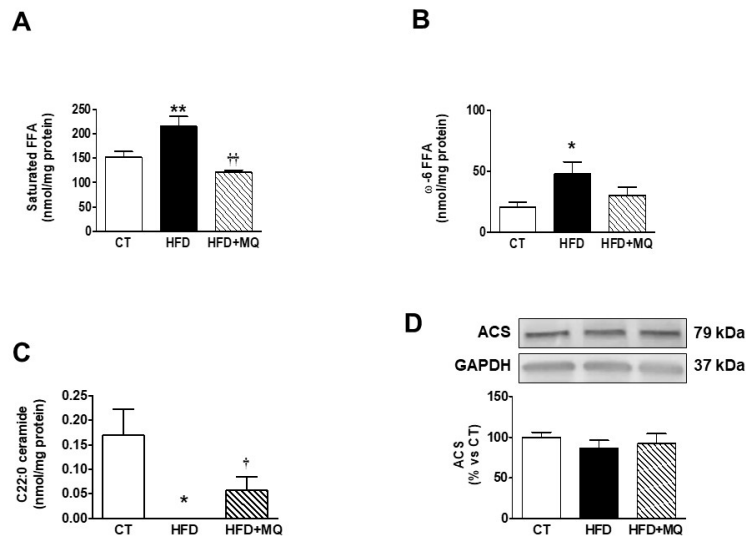

**Figure 2. Impact of the mitochondrial antioxidant MitoQ on mitochondrial lipid species and protein levels in heart of obese rats.** Hearts from rats fed a standard diet (CT) or a high fat diet (HFD) treated with vehicle or with MQ, the mitochondrial antioxidant (200  $\mu$ M), were analyzed. (A) Mitochondrial free fatty acids (FFA) enriched with saturated acids, (B) Mitochondrial FFA enriched with  $\omega$ -6 acids, (C) Mitochondrial ceramides enriched with (C22:0) and (D) Protein expression of acetyl CoA synthetase (ACS) are presented. Bar graphs represent the mean  $\pm$  SEM. of 6-8 animals normalized to glyceraldehyde-3-phosphate dehydrogenase (GAPDH). \* $p < 0.05$ ; \*\* $p < 0.01$ ; vs control group. † $p < 0.05$  †† $p < 0.01$  vs HFD group.

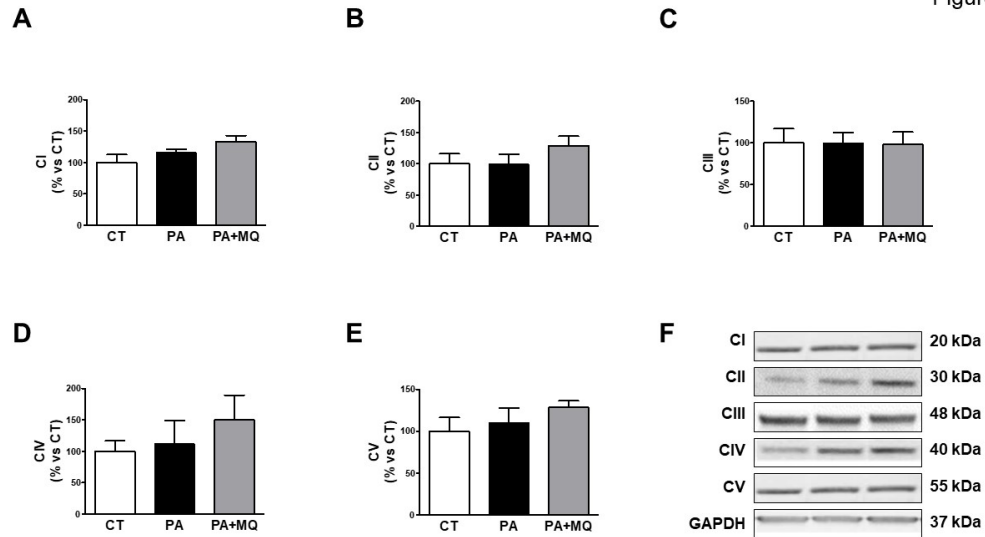

**Figure 3. Effects of antioxidant MiToQ on complexes protein levels in palmitic-acid-treated H9c2 cells.** Protein expression of mitochondrial complexes (A) I (subunit NDUFB8), (B) II ( SDHB subunit of complex II ) (C) III (core protein 2 UQCRC2), (D) IV (MTCO1 subunit 1 )and (E) V (alpha subunit) in cardiac myoblasts treated for 24 h with palmitic acid (200  $\mu$ M) in the presence or absence of the mitochondrial antioxidant MitoQ (MQ; 5 nM). (F) Representative blots for mitochondrial complex protein expressions. Bar graphs represent the mean  $\pm$  SEM. of 6-8 animals normalized to glyceraldehyde-3-phosphate dehydrogenase (GAPDH).
